# Supplementary material for: Next-generation sequencing of the whole mitochondrial genome identifies functionally deleterious mutations in patients with multiple sclerosis
Source: PubMed Central journal article supplement (PMC8820615; doi:10.1371/journal.pone.0263606), 2022-02-07

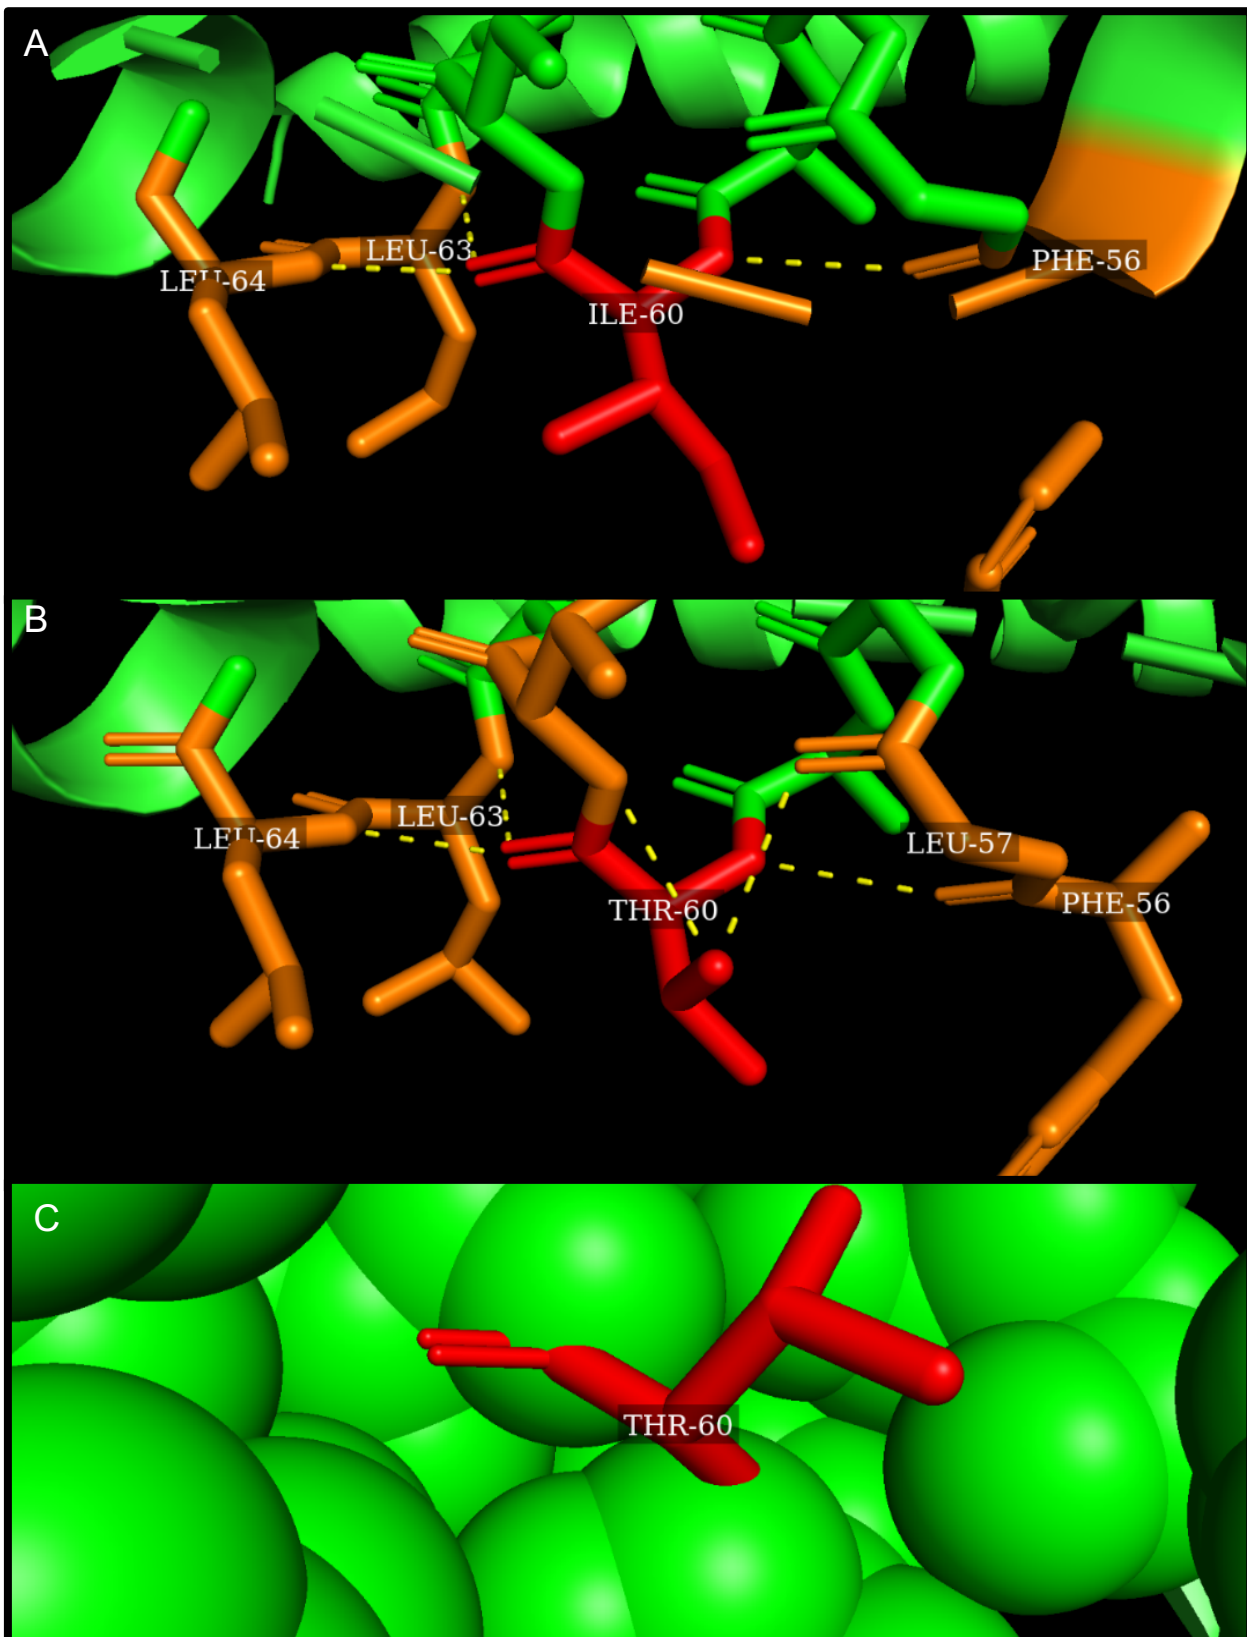

Supplement: pone.0263606.s001.pdf [file pone.0263606.s001.pdf]
